# Supplementary material for: Mining GO Annotations for Improving Annotation Consistency
Source: PLoS One. 2012 Jul 25;7(7):e40519. doi: 10.1371/journal.pone.0040519 (PMC3405096; doi:10.1371/journal.pone.0040519)
Supplement: Table S2 — Top 100 results ranked by support of the basic ARL methodology with a confidence threshold of 80% and a support threshold of 10 proteins. (XLS) [file pone.0040519.s002.xls]

## Sheet: Sheet1
Term 1	Term 2	Support	Confidence
catalytic activity	nucleotide binding	1140115	0.829432
purine nucleotide binding	ribonucleotide binding	1089239	0.999987
nucleoside binding	nucleotide binding	1043610	0.979439
nucleoside binding	purine nucleotide binding	1043425	0.979266
purine nucleoside binding	nucleotide binding	1041722	0.999981
purine nucleoside binding	purine nucleotide binding	1041722	0.999981
purine nucleotide binding	catalytic activity	1004295	0.848958
nucleoside binding	ribonucleotide binding	950010	0.891595
nucleoside binding	purine ribonucleotide binding	950010	0.891595
purine nucleoside binding	ribonucleotide binding	948311	0.910313
purine nucleoside binding	purine ribonucleotide binding	948311	0.910313
adenyl nucleotide binding	ribonucleotide binding	947956	0.9103
adenyl nucleotide binding	purine ribonucleotide binding	947956	0.9103
nucleoside binding	catalytic activity	945049	0.886939
purine nucleoside binding	catalytic activity	925915	0.888814
adenyl nucleotide binding	catalytic activity	925641	0.888871
ribonucleotide binding	catalytic activity	918014	0.842792
purine ribonucleotide binding	catalytic activity	918000	0.84279
adenyl ribonucleotide binding	catalytic activity	839385	0.885471
ATP binding	catalytic activity	837893	0.885508
transmembrane transporter activity	substrate-specific transporter activity	523844	0.883686
hydrolase activity, acting on acid anhydrides	binding	471911	0.882423
hydrolase activity, acting on acid anhydrides, in phosphorus-containing anhydrides	binding	471425	0.884432
pyrophosphatase activity	binding	469663	0.886535
nucleoside-triphosphatase activity	binding	462512	0.900719
hydrolase activity, acting on acid anhydrides	nucleotide binding	450991	0.843305
hydrolase activity, acting on acid anhydrides, in phosphorus-containing anhydrides	nucleotide binding	450530	0.845231
pyrophosphatase activity	nucleotide binding	450057	0.849526
nucleoside-triphosphatase activity	nucleotide binding	448984	0.874374
hydrolase activity, acting on acid anhydrides	purine nucleotide binding	442482	0.827394
hydrolase activity, acting on acid anhydrides	ribonucleotide binding	442465	0.827362
hydrolase activity, acting on acid anhydrides	purine ribonucleotide binding	442465	0.827362
hydrolase activity, acting on acid anhydrides, in phosphorus-containing anhydrides	purine nucleotide binding	442022	0.829269
hydrolase activity, acting on acid anhydrides, in phosphorus-containing anhydrides	ribonucleotide binding	442005	0.829237
hydrolase activity, acting on acid anhydrides, in phosphorus-containing anhydrides	purine ribonucleotide binding	442005	0.829237
pyrophosphatase activity	purine nucleotide binding	441556	0.83348
pyrophosphatase activity	ribonucleotide binding	441539	0.833448
pyrophosphatase activity	purine ribonucleotide binding	441539	0.833448
nucleoside-triphosphatase activity	purine nucleotide binding	440763	0.858364
nucleoside-triphosphatase activity	ribonucleotide binding	440748	0.858335
nucleoside-triphosphatase activity	purine ribonucleotide binding	440748	0.858335
electron carrier activity	binding	386038	0.913903
cofactor binding	catalytic activity	377768	0.942344
electron carrier activity	ion binding	353207	0.836179
electron carrier activity	cation binding	353207	0.836179
electron carrier activity	metal ion binding	353206	0.836177
sequence-specific DNA binding transcription factor activity	binding	346402	0.93316
sequence-specific DNA binding transcription factor activity	nucleic acid binding	331103	0.891946
nucleotidyltransferase activity	binding	326584	0.886221
sequence-specific DNA binding transcription factor activity	DNA binding	313939	0.845709
ATPase activity	binding	279259	0.921291
ATPase activity	nucleotide binding	276259	0.911394
ATPase activity	purine nucleotide binding	274607	0.905944
ATPase activity	ribonucleotide binding	274605	0.905937
ATPase activity	purine ribonucleotide binding	274605	0.905937
ATPase activity	nucleoside binding	274595	0.905904
ATPase activity	purine nucleoside binding	274595	0.905904
ATPase activity	adenyl nucleotide binding	274595	0.905904
ATPase activity	ATP binding	274593	0.905898
ATPase activity	adenyl ribonucleotide binding	274593	0.905898
tetrapyrrole binding	ion binding	267360	0.984614
tetrapyrrole binding	cation binding	267360	0.984614
tetrapyrrole binding	metal ion binding	267360	0.984614
tetrapyrrole binding	transition metal ion binding	261268	0.962178
tetrapyrrole binding	iron ion binding	259620	0.956109
coenzyme binding	catalytic activity	239556	0.932545
phosphotransferase activity, alcohol group as acceptor	kinase activity	234987	0.924251
tetrapyrrole binding	electron carrier activity	233253	0.859007
heme binding	electron carrier activity	231988	0.893571
DNA polymerase activity	binding	170479	0.971507
DNA polymerase activity	nucleic acid binding	169763	0.967426
heme-copper terminal oxidase activity	transporter activity	160682	0.999969
heme-copper terminal oxidase activity	transmembrane transporter activity	160682	0.999969
oxidoreductase activity, acting on heme group of donors	transporter activity	160681	0.999963
oxidoreductase activity, acting on heme group of donors, oxygen as acceptor	transporter activity	160681	1
heme-copper terminal oxidase activity	cation transmembrane transporter activity	160681	0.999963
oxidoreductase activity, acting on heme group of donors	cation transmembrane transporter activity	160681	0.999963
oxidoreductase activity, acting on heme group of donors, oxygen as acceptor	cation transmembrane transporter activity	160681	1
heme-copper terminal oxidase activity	ion transmembrane transporter activity	160681	0.999963
heme-copper terminal oxidase activity	monovalent inorganic cation transmembrane transporter activity	160681	0.999963
heme-copper terminal oxidase activity	hydrogen ion transmembrane transporter activity	160681	0.999963
heme-copper terminal oxidase activity	oxidoreductase activity, acting on heme group of donors	160681	0.999963
heme-copper terminal oxidase activity	oxidoreductase activity, acting on heme group of donors, oxygen as acceptor	160681	0.999963
heme-copper terminal oxidase activity	inorganic cation transmembrane transporter activity	160681	0.999963
heme-copper terminal oxidase activity	substrate-specific transmembrane transporter activity	160681	0.999963
heme-copper terminal oxidase activity	substrate-specific transporter activity	160681	0.999963
oxidoreductase activity, acting on heme group of donors	ion transmembrane transporter activity	160681	0.999963
oxidoreductase activity, acting on heme group of donors, oxygen as acceptor	ion transmembrane transporter activity	160681	1
oxidoreductase activity, acting on heme group of donors	monovalent inorganic cation transmembrane transporter activity	160681	0.999963
oxidoreductase activity, acting on heme group of donors, oxygen as acceptor	monovalent inorganic cation transmembrane transporter activity	160681	1
oxidoreductase activity, acting on heme group of donors	hydrogen ion transmembrane transporter activity	160681	0.999963
oxidoreductase activity, acting on heme group of donors, oxygen as acceptor	hydrogen ion transmembrane transporter activity	160681	1
oxidoreductase activity, acting on heme group of donors	inorganic cation transmembrane transporter activity	160681	0.999963
oxidoreductase activity, acting on heme group of donors	substrate-specific transmembrane transporter activity	160681	0.999963
oxidoreductase activity, acting on heme group of donors	substrate-specific transporter activity	160681	0.999963
oxidoreductase activity, acting on heme group of donors, oxygen as acceptor	inorganic cation transmembrane transporter activity	160681	1
oxidoreductase activity, acting on heme group of donors, oxygen as acceptor	substrate-specific transmembrane transporter activity	160681	1
oxidoreductase activity, acting on heme group of donors, oxygen as acceptor	substrate-specific transporter activity	160681	1
oxidoreductase activity, acting on heme group of donors	transmembrane transporter activity	160681	0.999963
oxidoreductase activity, acting on heme group of donors, oxygen as acceptor	transmembrane transporter activity	160681	1
